# Supplementary material
Source: PubMed Central journal article supplement (PMC5299969)
Supplement: halms987203-supplement_1.pdf [file halms987203-supplement_1.pdf]

**Supplementary Table S1.** Six-plasmid vector system for VSV-G-BLAM-LV production

| <b>Plasmids</b> | <b>Function / Encoded protein</b> | <b>Plasmid ratio<sup>a</sup></b> |
|-----------------|-----------------------------------|----------------------------------|
| pKlgagpol       | HIV-1 gagpol                      | 13                               |
| pKrev           | HIV-1 rev                         | 5                                |
| pRRL-PGK-NGFR   | proviral DNA                      | 20                               |
| pMDG            | VSV-G envelope                    | 7                                |
| pCMV4-BLAM-Vpr  | BLAM-Vpr                          | 15                               |
| pAdVAntage      | PKR inhibitor                     | 7.5                              |

<sup>a</sup>Plasmids ratio ( $\mu\text{g}$ ) used for the production of VSV-G-BLAM-LV in 293 T cells for a cell culture monolayer of 175  $\text{cm}^2$ . BLAM,  $\beta$ -lactamase; LV, lentiviral vector.

SUPPLEMENTARY DATA

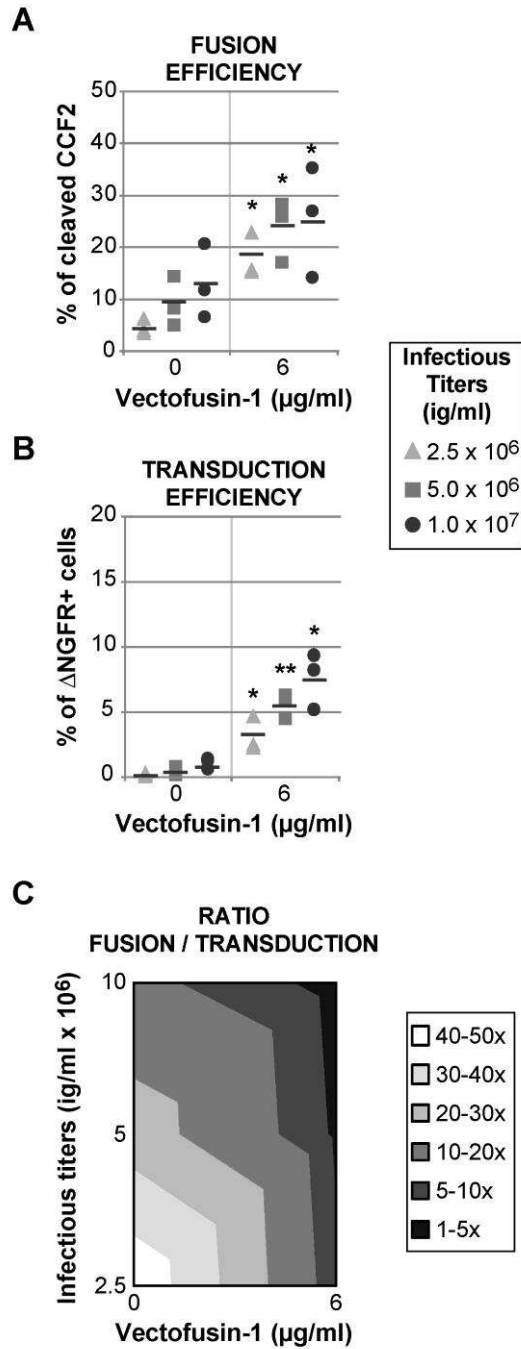

**Supplementary Fig. S1. Influence of the infectious titers and Vectofusin-1 (6µg/ml) on the fusion/transduction (F/T) ratio in hCD34+ cells.** Fusion (A) and transduction efficiencies (B) obtained for hCD34+ HSPCs isolated from three independent cord blood donors in presence of three vector doses of VSV-G-BLAM-LVs and in absence or presence of 6µg/ml of Vectofusin-1. Bars indicate the mean value of the distributions. (C) The average F/T ratio obtained for each condition from (A) and (B) have been plotted on a 2D contour chart as in Fig. 6. The lines in the contour chart delineate different F/T ratios ranging from 1-5 to 40-50 fold (\*\* p<0.01, \* p<0.05, bilateral paired Student's *t*-test).
